# Supplementary material
Source: Springer Nature journal article supplement (https://www.springermedizin.de/resource/supplementary/12889_2005_475_MOESM4_ESM.pdf/9500952)
Supplement: MOESM4 [file 9500952]

women

Men

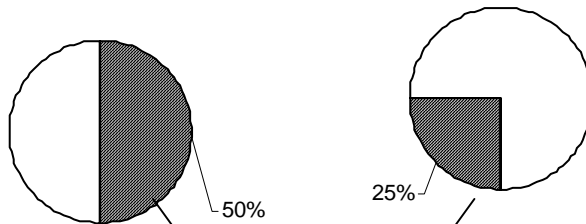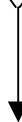

**Deceased**

37 % at Home  
63 % in Hospital

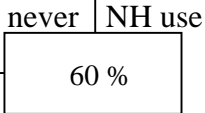

(in parish with NH 54%)  
(in parish without NH 66%)

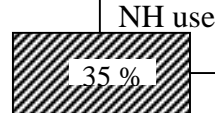

(in parish without NH 27%)  
(in parish with NH 42%)

**Deceased**

78 % in NH  
22 % in Hospital
